# Supplementary material
Source: ML conference proceedings conference paper supplement (https://proceedings.neurips.cc/paper_files/paper/2017/hash/11b921ef080f7736089c757404650e40-Abstract.html)
Supplement: Supplementary file [file 11b921ef080f7736089c757404650e40-Supplemental.zip]

---

# Introspective Classification with Convolutional Nets

## Supplementary Material

---

**Long Jin**  
UC San Diego  
longjin@ucsd.edu

**Justin Lazarow**  
UC San Diego  
jlazarow@ucsd.edu

**Zhuowen Tu**  
UC San Diego  
ztu@ucsd.edu

### A Proof of the convergence of $p_t^-(\mathbf{x}) \xrightarrow{t=\infty} p^+(\mathbf{x})$

The convergence of  $p_t^-(\mathbf{x}) \xrightarrow{t=\infty} p^+(\mathbf{x})$  can be derived, inspired by the proof from [1]:  $KL[p^+(\mathbf{x})||p_{t+1}^-(\mathbf{x})] \leq KL[p^+(\mathbf{x})||p_t^-(\mathbf{x})]$  where  $KL$  denotes the Kullback-Leibler divergence and  $p(x|y = +1) \equiv p^+(x)$ , under the assumption that classifier at  $t + 1$  improves over  $t$ .

Proof:

$$p_t^-(\mathbf{x}) = \frac{1}{Z_t} \frac{q_t(y = +1|\mathbf{x})}{q_t(y = -1|\mathbf{x})} p_r^-(\mathbf{x}),$$

and

$$p_{t+1}^-(\mathbf{x}) = \frac{1}{Z_{t+1}} \frac{q_{t+1}(y = +1|\mathbf{x})}{q_{t+1}(y = -1|\mathbf{x})} p_r^-(\mathbf{x}).$$

$$p_{t+1}^-(\mathbf{x}) = \frac{1}{H_{t+1}} \frac{\exp\{\mathbf{w}_{t+1}^{(1)T} \phi(\mathbf{x}; \mathbf{w}_{t+1}^{(0)})\}}{\exp\{\mathbf{w}_t^{(1)T} \phi(\mathbf{x}; \mathbf{w}_t^{(0)})\}} p_t^-(\mathbf{x})$$

where

$$H_{t+1} = \int \frac{\exp\{\mathbf{w}_{t+1}^{(1)T} \phi(\mathbf{x}; \mathbf{w}_{t+1}^{(0)})\}}{\exp\{\mathbf{w}_t^{(1)T} \phi(\mathbf{x}; \mathbf{w}_t^{(0)})\}} p_t^-(\mathbf{x}) d\mathbf{x}$$

$$\begin{aligned} & KL[p^+(\mathbf{x})||p_t^-(\mathbf{x})] - KL[p^+(\mathbf{x})||p_{t+1}^-(\mathbf{x})] \\ &= \int p^+(\mathbf{x}) \ln \left( \frac{1}{H_{t+1}} \frac{\exp\{\mathbf{w}_{t+1}^{(1)T} \phi(\mathbf{x}; \mathbf{w}_{t+1}^{(0)})\}}{\exp\{\mathbf{w}_t^{(1)T} \phi(\mathbf{x}; \mathbf{w}_t^{(0)})\}} p_t^-(\mathbf{x}) \right) d\mathbf{x} - \int p^+(\mathbf{x}) \ln[p_t^-(\mathbf{x})] d\mathbf{x} \\ &= \int p^+(\mathbf{x}) \ln \frac{1}{H_{t+1}} d\mathbf{x} + \int p^+(\mathbf{x}) \ln \frac{\exp\{\mathbf{w}_{t+1}^{(1)T} \phi(\mathbf{x}; \mathbf{w}_{t+1}^{(0)})\}}{\exp\{\mathbf{w}_t^{(1)T} \phi(\mathbf{x}; \mathbf{w}_t^{(0)})\}} d\mathbf{x} \\ &= \ln \frac{1}{H_{t+1}} + \int p^+(\mathbf{x}) \ln \frac{\exp\{\mathbf{w}_{t+1}^{(1)T} \phi(\mathbf{x}; \mathbf{w}_{t+1}^{(0)})\}}{\exp\{\mathbf{w}_t^{(1)T} \phi(\mathbf{x}; \mathbf{w}_t^{(0)})\}} d\mathbf{x} \geq 0. \end{aligned}$$

Since  $H_{t+1} = \int \frac{\exp\{\mathbf{w}_{t+1}^{(1)T} \phi(\mathbf{x}; \mathbf{w}_{t+1}^{(0)})\}}{\exp\{\mathbf{w}_t^{(1)T} \phi(\mathbf{x}; \mathbf{w}_t^{(0)})\}} p_t^-(\mathbf{x}) d\mathbf{x} \leq 1$  and  $\int p^+(\mathbf{x}) \ln \frac{\exp\{\mathbf{w}_{t+1}^{(1)T} \phi(\mathbf{x}; \mathbf{w}_{t+1}^{(0)})\}}{\exp\{\mathbf{w}_t^{(1)T} \phi(\mathbf{x}; \mathbf{w}_t^{(0)})\}} d\mathbf{x} \geq 0$ .

Given the training data and the previously generated pseudo-negative samples are all retained in each step, we assume that the classifier at  $t + 1$  improves over that at  $t$ . This shows that  $p_{t+1}^-(\mathbf{x})$  converges to  $p(\mathbf{x}|y = +1)$  and the convergence rate depends on the classification error at each step.

### References

[1] Z. Tu. Learning generative models via discriminative approaches. In *CVPR*, 2007.
